# Supplementary material for: GRG5/AES Interacts with T-Cell Factor 4 (TCF4) and Downregulates Wnt Signaling in Human Cells and Zebrafish Embryos
Source: PubMed Central journal article supplement (PMC3698143; doi:10.1371/journal.pone.0067694), 2013-07-01
Supplement: pone.0067694.s003.pdf [file pone.0067694.s003.pdf]

**β-catenin BD**

|         |            |             |             |             |             |             |     |
|---------|------------|-------------|-------------|-------------|-------------|-------------|-----|
| HsTCF4  | MPQLNGGGGD | -----       | -----       | DLGANDDELIS | FKDEGE--QE  | EKSSENESAE  | 38  |
| HsTCF3  | MPQLGGGGGG | GGGGSGGGG   | SSAGAAGGGD  | DLGANDDELIP | FQDECG-EEQ  | EPSSDSSSAQ  | 59  |
| HsLEF1  | MPQLSGGGGG | GGGDP----   | -----       | ELCATDEMIP  | FKDEGDPORE  | KIFABISHPE  | 45  |
| HsTCF1  | MPQLDSGGGG | AGGGD----   | -----       | DLGAPDELLA  | FQDEGE-EDD  | DKSRDSIGPE  | 44  |
| HsTCF4  | R--DLADVKS | SLVNESETNQ  | NSSDSEAEER  | RPPRSEFR    | DKSRRESLEEA | AKRQDG-GLF  | 95  |
| HsTCF3  | R--DLDEVKS | SLVNESENQS  | -SSDSEAEER  | RQPVRDFTQ   | -KPRDYFAEV  | RRPQDS-AFF  | 114 |
| HsLEF1  | EEGLADIKS  | SLVNESEIIP  | -ASNGHEVAR  | QAQTSQEPYH  | DKAREHPDDG  | -KHPDG-GLY  | 102 |
| HsTCF1  | R--DLAELKS | SLVNESEGAA  | GGAGIPGVPG  | AGAGARGEAE  | ALGREHAAQR  | LFPDKLPEPL  | 102 |
| HsTCF4  | K-GPPYPGYP | -FHMIPDLTS  | -PYLPNGSLS  | FT-ARTYLDQ  | KWPLLDVQAG  | SLQSRQALKD  | 151 |
| HsTCF3  | K-GPPYPGYP | -FHMIPDLSS  | -PYLSNGPLS  | PGGARTYLDQ  | KWPLLDVDP-- | ---SSATVKD  | 166 |
| HsLEF1  | NKGPSYSSYS | GYHMPMNN    | DPYLSNGSLS  | P-----      | -----       | -----       | 133 |
| HsTCF1  | EDGLKAPECT | SGMYKETVYS  | AFNLLMHYPP  | PS-----     | -----       | -----       | 134 |
| *       |            |             |             |             |             |             |     |
| HsTCF4  | ARSPSPAHI  | VSNVWVWVCHP | HHVHPITPLI  | TVSNDFHTPG  | NPPPHLPADV  | DPKGTGIPRPP | 211 |
| HsTCF3  | TRSPSPAHL  | -NRVWVWVCHP | HMHHPITPLI  | TVSNDFHSPG  | SPPTHLSPEI  | DPKGTGIPRPP | 225 |
| HsLEF1  | -----PIPR  | SNVWVWVWVCP | HAVHPITPLI  | TVSDFHSPG   | SHPSHIPSDV  | NSKQGMHRHP  | 188 |
| HsTCF1  | ----GAGQHP | QPPPHKAN    | QPHGVPOLS   | LV--EHN-S   | PHPTPAPADI  | SQKQ-VRPL   | 186 |
| HsTCF4  | HPPDISPYYP | LSPGTVGQIP  | HPHGLVPCQ   | GQPVYPIIT-  | GGFRHPYPTA  | LTVNAEVS--  | 268 |
| HsTCF3  | HPSELSPVYP | LSPGAVGQIP  | HPHGLVPCQ   | GQPVYSLPP-  | GGFRHPYPTA  | LAMNASHSSL  | 283 |
| HsLEF1  | PAPDIPTYYP | LSPGGVGQIT  | PHLGLVPCQ   | GQPVYPIIT-- | GGFRQPYPS   | LSVDTSMS--  | 240 |
| HsTCF1  | QTDLSGFRYS | LTSGSMGOLP  | HTWVMP----  | SPPLVPLSPS  | GGFRQHPAP   | TAAPGAPYP-  | 241 |
| HsTCF4  | ---FFPHHMV | P-PHHTL-HT  | TCIPHPAIVT  | PIVKQESSQS  | DVGLSHSSKH  | QDSKKEEEK   | 323 |
| HsTCF3  | VSEFFSPHMV | APAHPL-PT   | SCIPHPAIVS  | PIVKQEPAPP  | SLSPAVSVKS  | PVTVKKEEEK  | 342 |
| HsLEF1  | ---FFSHHML | P-GPPGP-HT  | TCIPHPAIVT  | POVKQHPHT   | DSDLMHVKPQ  | HEQRKEQEPK  | 295 |
| HsTCF1  | ---FFTHPSL | MLGSGVPGHP  | AATPHPAIVP  | PSGKQELQPF  | DRN---LKTQ  | AESKAEREAK  | 295 |
| HMG-box |            |             |             |             |             |             |     |
| HsTCF4  | KPHKKPLNA  | FMLYMKEMRA  | KVAECTLKE   | SAAINQILGR  | RWHLSREEQ   | AKYYELARKE  | 383 |
| HsTCF3  | KPHKKPLNA  | FMLYMKEMRA  | KVAECTLKE   | SAAINQILGR  | RWHLSREEQ   | AKYYELARKE  | 402 |
| HsLEF1  | RPHKKPLNA  | FMLYMKEMRA  | NVAECTLKE   | SAAINQILGR  | RWHLSREEQ   | AKYYELARKE  | 355 |
| HsTCF1  | KPHKKPLNA  | FMLYMKEMRA  | KVAECTLKE   | SAAINQILGR  | RWHLSREEQ   | AKYYELARKE  | 355 |
| *       |            |             |             |             |             |             |     |
| HsTCF4  | RQLHMQLYPG | WSARDNYGKK  | KKRKRKQPG   | ETNEHSECF   | NPCLSLPPIT  | DLSAPKKCRA  | 443 |
| HsTCF3  | RQLHSQLYPT | USARDNYGKK  | KKRKRKQLS   | QTQSQQ----  | -----       | -----       | 438 |
| HsLEF1  | RQLHMQLYPG | WSARDNYGKK  | KKRKRK----  | -----       | -----       | -----       | 382 |
| HsTCF1  | RQLHMQLYPG | WSARDNYGKK  | KRRSREK---- | -----       | -----       | -----       | 382 |
| HsTCF4  | RFGLDQQNNW | CGPCRRKRC   | VRYIQGEGSC  | LSPSSDGLS   | LDSPPSPNL   | LGSPPRDAKS  | 503 |
| HsTCF3  | ---QVQEAEG | ALASKKPC    | VQYLPPEKPC  | DSPASSHGM   | LDSPATPSAA  | LASPAAPAT   | 495 |
| HsLEF1  | ---LQESASG | TGP----RMT  | AAYI-----   | -----       | -----       | -----       | 399 |
| HsTCF1  | -----HQEST | TGG----KRN  | AFGTPEKAA   | APAPFLPMTV  | L-----      | -----       | 414 |
| HsTCF4  | QTEQTQPLSL | SLKPDPLAHL  | SMMPPPALL   | LAEATHKASA  | LCPNGALDLP  | PAALQPAAPS  | 563 |
| HsTCF3  | HSEQAQPLSL | TTKPETRAQL  | ALHS--AAFL  | SAKAAASSG   | QMGSQPLLS   | RPLPLGSMPT  | 553 |
| HsLEF1  | -----      | -----       | -----       | -----       | -----       | -----       | 399 |
| HsTCF1  | -----      | -----       | -----       | -----       | -----       | -----       | 414 |
| HsTCF4  | SSIAQPS--T | SWLHSHSSLA  | GTQPQLSLV   | TKSLE       | 596         |             |     |
| HsTCF3  | ALLASPPSFP | ATLHAHQALP  | VLQAQPLSLV  | TKSAH       | 588         |             |     |
| HsLEF1  | -----      | -----       | -----       | -----       | 399         |             |     |
| HsTCF1  | -----      | -----       | -----       | -----       | 414         |             |     |

Figure S3
