# Supplementary material for: GRG5/AES Interacts with T-Cell Factor 4 (TCF4) and Downregulates Wnt Signaling in Human Cells and Zebrafish Embryos
Source: PubMed Central journal article supplement (PMC3698143; doi:10.1371/journal.pone.0067694), 2013-07-01
Supplement: pone.0067694.s004.pdf [file pone.0067694.s004.pdf]

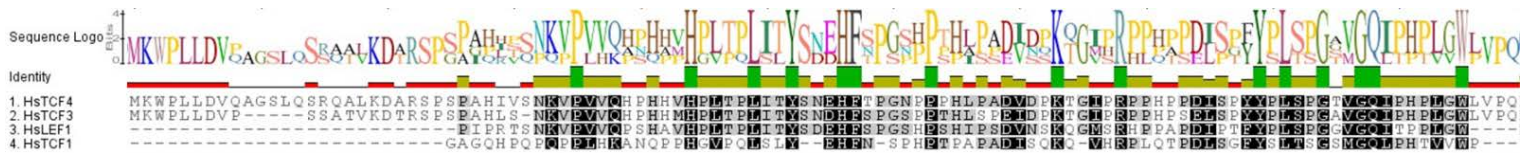

Figure S4
